# Supplementary material
Source: HighWire-hosted journal article supplement (https://diabetes.diabetesjournals.org/content/suppl/2007/11/26/db07-0403)
Supplement: db070403SupplementalDataRevised.pdf [file db070403SupplementalDataRevised.pdf]

## Online Supplemental Data

Figure S1-A

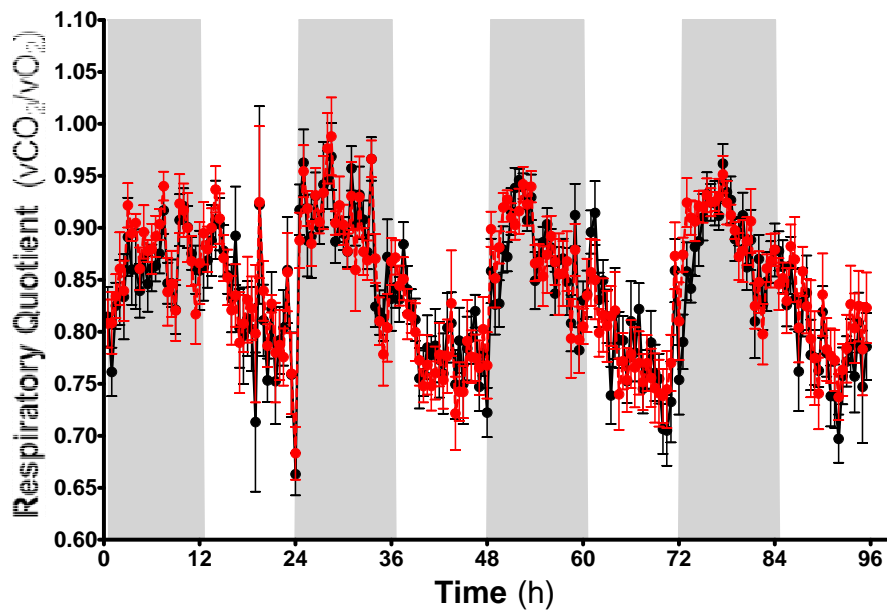

Figure S1-B

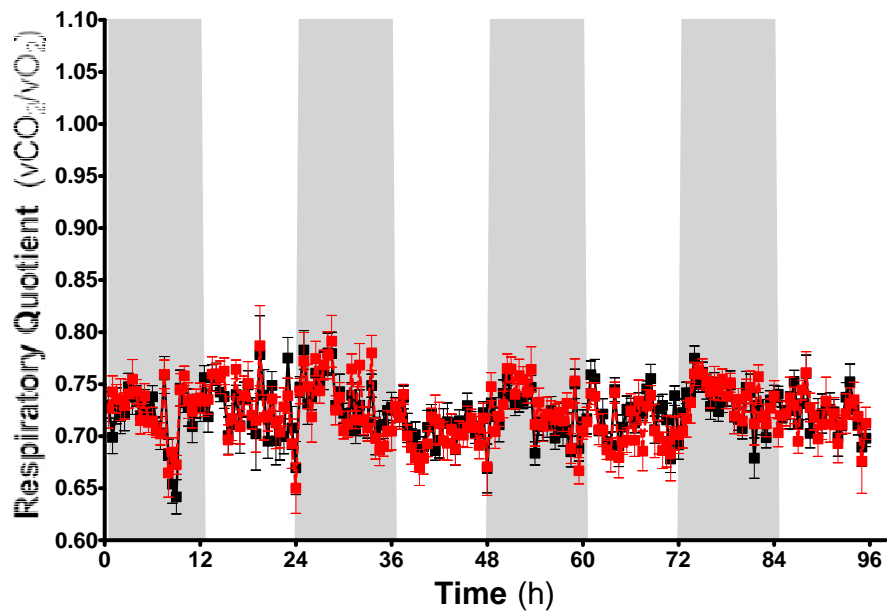

Figure S1: Respiratory quotient in *apoE*<sup>-/-</sup> (red circles) and *apoE*<sup>+/+</sup> (black circles) mice on control diet at 16 weeks of the study (panel A). Respiratory quotient in *apoE*<sup>-/-</sup> (red squares), *apoE*<sup>+/+</sup> (black squares), mice on diabetogenic diet for 16 weeks (panel B). The grey and white shaded areas represent dark and light phases, respectively.

Figure S2:

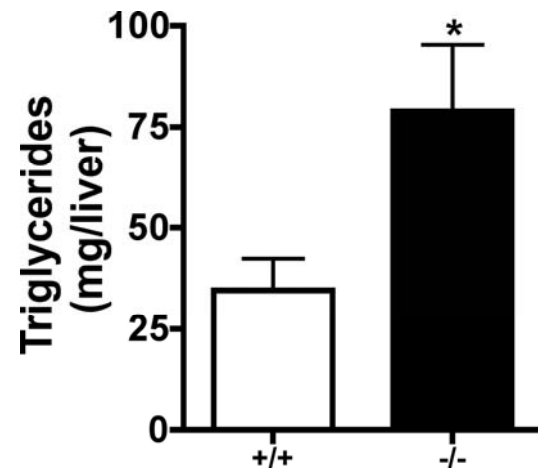

Figure S2: Triglyceride content in livers of *apoE*<sup>-/-</sup> (filled bars) and *apoE*<sup>+/+</sup> (open bars) mice on control diet. (n = 8, P < 0.05).
